# Supplementary material for: Facile synthesis of ZnS nanobowl arrays and their applications as 2D photonic crystal sensors
Source: Royal Society of Chemistry journal article supplement (doi:10.1039/c3tc30118d), 2013-01-01
Supplement: c3tc30118d.pdf [file c3tc30118d.pdf]

## Electronic supplementary information

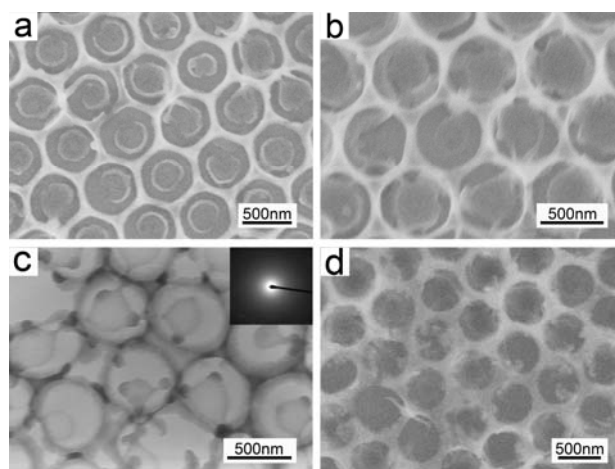

**Fig. S1** SEM (a,b,d) and TEM (c) images of ZnS nanobowl arrays prepared with 600 nm PS spheres by interfacial reaction through gas diffusion after different times: (a) 5 h, (b,c) 10 h, and (d) 20 h . Inset in (c) shows the corresponding SAED pattern. Synthesis condition: MCCs of 600 nm PS spheres were floated on the surface of 3 mL 50 mM  $\text{Zn}(\text{CH}_3\text{COO})_2$  solution and 1 g TAA powder was used to release  $\text{H}_2\text{S}$  gas.

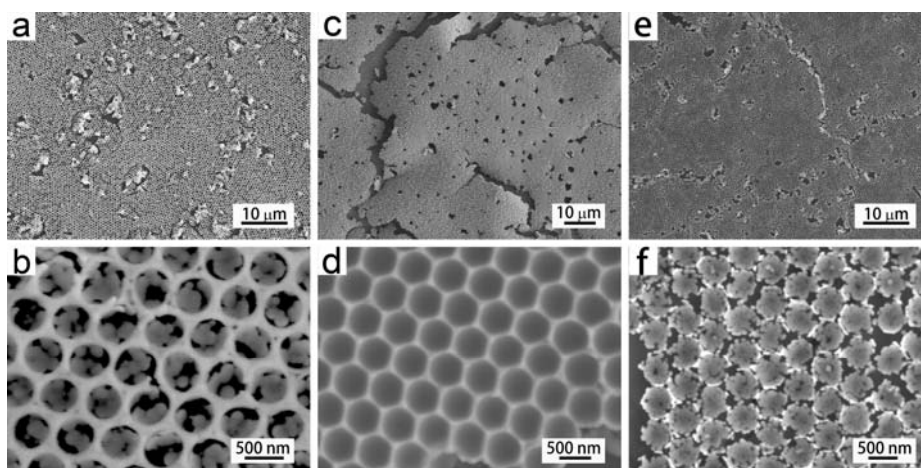

**Fig. S2** SEM images of ZnS nanoarrays prepared with 600 nm PS spheres under different solution conditions. (a, b) 0.06 M  $\text{Zn}(\text{CH}_3\text{COO})_2$  and 0.12M TAA; (c, d) 0.06M  $\text{Zn}(\text{CH}_3\text{COO})_2$ , 0.12M TAA and 0.03M  $\text{Na}_2\text{EDTA}$ ; (e, f) 0.06M  $\text{Zn}(\text{CH}_3\text{COO})_2$ , 0.12M TAA and 0.2M  $\text{CH}_3\text{COONH}_4$ .
